1 Rapid evolution in response to climate-change-induced drought and its  
2 demographic and genetic controls

3

4 **John W. Benning\***

5 University of Wyoming

6 Department of Botany

7 Laramie, WY, USA

8 \*jwbenning@gmail.com

9

10 **Alexai Faulkner**

11 University of Minnesota

12 Department of Plant and Microbial Biology

13 Saint Paul, MN, USA

14

15 **David A. Moeller**

16 University of Minnesota

17 Department of Plant and Microbial Biology

18 Saint Paul, MN, USA

19

## Abstract

20 Populations often vary in their evolutionary responses to a shared environmental  
21 perturbation. A key hurdle in building more predictive models of rapid evolution is  
22 understanding this variation – why do some populations and traits evolve while others do not?  
23 However, studies documenting rapid evolution usually lack the demographic and genetic data  
24 needed to understand varied evolutionary responses. We combined long-term demographic and  
25 environmental data, estimates of quantitative genetic variance components, and a resurrection  
26 experiment to gain mechanistic insights into variation in evolutionary responses of five traits in  
27 two populations of a California endemic plant that recently experienced a severe multiyear  
28 drought. Earlier flowering phenology evolved in only one of the two populations, though both  
29 populations experienced similar precipitation patterns and demographic declines during drought  
30 and were estimated to have similar narrow-sense heritability of flowering phenology. However,  
31 demographic data indicated that seed input in years prior to the drought was 125% higher in the  
32 non-evolving population compared to the evolving population, suggesting that recruitment from  
33 the seedbank may have constrained evolution in the non-evolving population. Gene flow through  
34 time via seed banks may be an important, underappreciated control on rapid evolution in  
35 response to extreme environmental perturbations.

36

37 **Keywords:** adaptation; evolutionary rescue; *Clarkia xantiana*; seed bank; genetic constraints

38

## Introduction

39           Extreme environmental perturbations offer excellent opportunities to examine evolution  
40 in natural populations on ecological timescales [1]. Strong episodes of environmental change  
41 have caused rapid evolution in lizards [2,3], finches [4], and plants [5]. Beyond offering  
42 fundamental insights into the evolutionary process, this and related work speak to the potential  
43 for natural populations to evolve in response to anthropogenic forcings like climate change, and  
44 to the importance of adaptation for the persistence of populations [6–8]. However, it remains  
45 poorly understood as to why rapid evolution often fails to occur in some populations despite the  
46 same environmental episode resulting in evolution in other populations.

47           Resurrection experiments are increasingly used to directly examine evolutionary change  
48 before and after an environmental event predicted to exert strong selection on populations [5,9].  
49 The power of resurrection experiments lies in their ability to precisely quantify short-term  
50 evolutionary responses, rather than only making predictions of the trajectory of evolution, while  
51 controlling for confounding environmental effects on phenotypes. In short, the resurrection  
52 approach entails rearing different generations of a population contemporaneously in a common  
53 environment to directly quantify phenotypic evolution. Though only a modest number of  
54 resurrection studies have been published to date [10], such experiments with plants have  
55 sometimes demonstrated rapid evolution in response to periods of drought [5,11,12].

56           Just as important as these positive results, however, are instances in which resurrection  
57 experiments do *not* find evidence of rapid evolution. Populations of a species can vary in their  
58 responses to the same climatic fluctuation [12,13], and even extreme climatic anomalies can  
59 result in no discernible phenotypic evolution of putatively important traits [14]. What underlies  
60 this variation in populations' evolutionary responses to extreme events? While the resurrection

61 approach is a powerful method to determine if phenotypic evolution has occurred, it does not  
62 typically provide insight into the demographic and genetic controls on evolutionary change.

63 A more comprehensive understanding of the causes and consequences of rapid evolution  
64 can be gained by coupling evolutionary analyses with long-term demographic and quantitative  
65 genetic investigations. Sharp declines in population size due to environmental perturbations will  
66 reduce the efficacy of selection and increase the influence of stochastic processes like genetic  
67 drift [15,16]. Such demographic, environmental, or genetic stochasticity may stymie adaptation,  
68 potentially causing population extinction before ‘evolutionary rescue’ can occur [17–19]. Models  
69 and experiments have further shown that evolutionary rescue is less probable when the  
70 environment changes suddenly compared to when the change is gradual [20]. As such, the rate  
71 and severity of demographic decline can provide insight into instances where some populations  
72 fail to evolve in response to an extreme event that drove rapid evolution in other conspecific  
73 populations. These demographic costs may be especially important if the extreme event occurs  
74 across multiple generations [21].

75 For organisms with dormancy, long-term outcomes of selection can also be affected by  
76 the presence of a germ bank (seed or egg bank). Populations that often experience significant  
77 environmental fluctuations may evolve mechanisms that confer dormancy as a bet-hedging  
78 strategy [22]. While germ banks may buffer populations from extinction [23,24], they may also  
79 constrain evolutionary responses to environmental change due to gene flow among generations  
80 [25,26]. This “temporal migration” can slow the rate of adaptive evolution [27,28]. Alleles  
81 favored prior to a selective event will be ‘reintroduced’ to the population from the germ bank  
82 during and after the event. If those same alleles are selected against during the event, this gene  
83 flow can retard adaptation [but see 29]. Moreover, the environmental and demographic history of

84 populations just prior to an extreme event likely affects the magnitude of gene flow from the  
85 past. For example, high fecundity of generations immediately prior to an extreme environmental  
86 event would increase input to the seed bank. Therefore, historical demographic data should  
87 provide insight into the influence of germ banks on population responses to selection.

88         Strong environmental perturbations typically exert selection on traits, but the response to  
89 selection will depend upon the presence of sufficient additive genetic variance for traits  
90 underlying fitness variation [30,31]. A population's response to selection will be directly  
91 proportional to a given trait's narrow-sense heritability,  $h^2 = V_A/V_p$  [32]. In the context of  
92 resurrection experiments, measuring the additive genetic variance of ecologically-important traits  
93 may help us understand why traits do or do not evolve in different populations exposed to similar  
94 selective regimes. While tests of rapid evolution are increasingly common, few studies have  
95 simultaneously examined quantitative genetic variation and its potential role in facilitating or  
96 hindering adaptation (but see Franks et al. 2007). Furthermore, resurrection experiments usually  
97 examine cohorts from before and at the end of an extreme event [but see 33]. A key question is  
98 how long evolutionary changes that occur in response to these events persist beyond them.  
99 Including later cohorts in a resurrection experiment allows us to assess the temporal stability of  
100 evolutionary responses and the extent to which dormancy might delay responses to selection.  
101 When paired with associated demographic data from natural populations, such a design gives  
102 inference to how rapid evolution (or its absence) influences a populations' longer-term  
103 phenotypic and demographic trajectory.

104         The Southwest of the United States is in the midst of the most severe multi-decadal  
105 drought (i.e., megadrought) in recorded history (at least since 800 C.E.) [34,35]. Recent analyses  
106 have shown that anthropogenic climate change has been a key driver and accounts for an

107 estimated 42% of the soil moisture anomaly [35,36]. We examined evolutionary responses to the  
108 most severe episode of this climate anomaly, which began in the latter half of 2011 and ended in  
109 late 2015 in our study area. Our work focused on a well-studied plant, *Clarkia xantiana* ssp.  
110 *xantiana*, which is endemic to Southern California, U.S.A. We used a resurrection experiment to  
111 test whether traits likely to mediate drought adaptation exhibited rapid evolution and whether  
112 genetic or demographic constraints modulated responses.

113 First, we monitored environmental and demographic variation over 12 years (2006 –  
114 2017), spanning a period from six years prior to drought until two years after the drought ended.  
115 Those data provided insight into the severity and rate of environmental and demographic change,  
116 as well as the magnitude of input to the seed bank in years just prior to the drought episode.  
117 Second, to test for rapid evolution in response to drought, we used a resurrection experiment  
118 with individuals from three time points — prior to the prolonged drought (2011), at the end of  
119 the drought (2015), and two years later, after more average precipitation resumed (2017). This  
120 latter sample allowed us to examine whether any evolutionary responses persisted, increased, or  
121 evolved back toward the original population mean. We measured a suite of traits that prior  
122 studies have shown to confer drought escape and/or avoidance. Last, we also conducted crosses  
123 to generate a pedigreed population to estimate the additive genetic variance and narrow-sense  
124 heritability for each of these traits in each population. We predicted that traits exhibiting high  
125 heritability would be more likely to respond to selection while those exhibiting low heritability  
126 may not have evolved.

127

## Material and Methods

### 128 Study System

129 *Clarkia xantiana* ssp. *xantiana* A. Gray (Onagraceae) is a predominantly outcrossing  
130 winter annual native to the southern Sierra Nevada foothills and Transverse Ranges of  
131 California, USA [37]. In this Mediterranean climate, the bulk of precipitation occurs during  
132 winter and early spring. Plants germinate November - March during the rainy season, begin  
133 flowering in May, and set seed in late June. In this study, we focus on two populations, KYE and  
134 S22. KYE occupies oak woodland habitat on granite-derived soils characteristic of the more  
135 mesic, western portion of *C. x. xantiana*'s distribution (35.6240674°, -118.5156798°). S22 is  
136 located near the subspecies' eastern geographic range limit and occupies a more xeric, higher  
137 elevation site in pine woodland on metasedimentary-derived soils (35.83996°, -118.450386°).  
138 These metasedimentary-derived soils occur along the Kern Canyon Fault, a ca. 150km fault that  
139 parallels the Kern River through the Southern Sierra [38,39]. [Site identifiers are 57x (KYE) and  
140 22x (S22) for consistency with previous and future *C. x. xantiana* studies.)]

### 141 Climatic and demographic data

142 We obtained growing season precipitation data (November - June) for years 2006-2017  
143 from long-term weather monitoring stations (HOBO Onset) at each site. Data on population size  
144 and seed production were collected as part of a long-term demographic study of 36 populations  
145 across the range of *C. x. xantiana*. As a proxy for *C. x. xantiana* population size at each site in  
146 years 2006-2017, we obtained counts of the number of fruiting plants at each site, as estimated

147 from censusing 58-129 0.5 m<sup>2</sup> quadrats across the extent of each site in late June / early July of  
148 each year. We report these data as the average number of fruiting plants per plot. We also  
149 recorded the number of fruits per plant on a subset of these plants (mean of 132 plants per site  
150 per year). We obtained estimates of the number of seeds per fruit from fruits collected from  
151 across each population (mean of 27 fruits per site per year). We report the estimated seed input  
152 per plot as the product of the average number of fruiting plants per plot, the average number of  
153 fruits per plant, and the average number of seeds per fruit.

## 154 Seed collection and refresher generation

155 We used seeds collected as part of the aforementioned long-term demographic study on  
156 *C. x. xantiana*. Seeds were collected from a haphazard sampling of plants (dozens to hundreds of  
157 plants, depending on field conditions) across the spatial extent of sites KYE and S22 in late June  
158 of years 2011 (pre-drought), 2015 (end of drought), and 2017 (after two years of more average  
159 precipitation following the drought). All seeds from a given dam constitute a maternal family. To  
160 standardize maternal environmental effects, we grew plants from each year together in a  
161 greenhouse for one generation to produce seeds for the resurrection experiment. This step is  
162 essential because 1) maternal environmental effects from each time point could confound  
163 inferences of phenotypic evolution, and 2) the differing lengths of seed storage for each  
164 generation could affect the subsequent expression of traits (e.g., longer germination times for  
165 older seeds) [10].

166 For each of the three generations of each population (six “cohorts”), we grew 1-5 plants  
167 from each of 20 haphazardly selected maternal families (N = 219 plants) in a fully randomized  
168 design in the greenhouse in spring 2018. Most (66%) of maternal families were represented by

169 two plants; representation of families varied due to unequal germination. Within each cohort,  
170 half the plants were randomly assigned as sires and each sire was mated to two unique dams  
171 (with all plants serving as dams) to produce a pedigreed population for the measurement round  
172 of the experiment. We also grew individuals from a third site, Mill Creek, during this generation  
173 prior to the resurrection experiment, but dropped this site from the subsequent experiment for  
174 feasibility; data from the Mill Creek refresher generation did not suggest evolution of any of the  
175 three measured traits (growth rate, days to flowering, SLA; Fig. S1).

## 176 Measurement generation

177 With the seeds produced from crosses, we grew the six offspring cohorts in a fully  
178 randomized design in the greenhouse in spring 2019 to assess phenotypic changes across  
179 generations for each population. Of the original 20 maternal families planted for each year cohort  
180 in the refresher generation, 16-20 were represented (as sire and/or dam) in this pedigreed  
181 population of offspring. We sowed six seeds for each of 22-28 dams from each parental cohort in  
182 plug trays with germination mix in the growth chamber and scored germination for 33 days;  
183 there were 83-122 germinants per cohort (Table S1). Up to four seedlings per dam (haphazardly  
184 chosen) were transplanted into individual 656 mL Deepots (Stuewe & Sons, Tangent, OR) filled  
185 with a 1:1 mix of sand and potting soil. Pots were arranged in a completely randomized design in  
186 the greenhouse on a 16/8 hr light schedule and watered as needed. Final sample sizes varied due  
187 to unequal seed availability and germination among cohorts ( $n = 65 - 97$  individuals per year  
188 cohort for post-germination traits; Table S1).



## 189 Trait measurements

190 We measured five traits that have previously been shown to be related to drought escape  
191 and/or avoidance: days to germination, growth rate, days to flowering, specific leaf area (SLA),  
192 and leaf succulence. Faster germination, growth, or flowering phenology may allow plants to  
193 take advantage of the relatively mesic early growing season and complete their life cycle before  
194 the onset of drier conditions [5,11,40], though delayed germination may also be selected for in  
195 arid environments [e.g., 41]. Lower SLA and increased leaf succulence can increase water use  
196 efficiency, and evolution in these physiological traits may represent drought avoidance  
197 adaptations [40,42]. We also measured two fitness proxies: total number of flowers produced and  
198 shoot (aboveground) biomass.

199 Days to germination was the number of days elapsed between sowing and cotyledon  
200 emergence. Growth rate was measured as the number of leaves produced per day, measured for  
201 plants 41-43 days post-germination (i.e., growth rate was calculated as the number of leaves at  
202 measurement divided by the plant age in days at measurement). One fully-expanded leaf was  
203 collected from each plant 64-75 days post-germination; we recorded fresh and dry weight for that  
204 leaf and used ImageJ [43] to measure leaf area from a photo of the fresh leaf. SLA was  
205 calculated as  $\text{mm}^2 \text{mg}^{-1}$ ; leaf succulence was calculated as leaf wet weight / leaf dry weight.  
206 Days to flowering was measured as the days elapsed between seed sowing and the opening of a  
207 plant's first flower. Measuring flowering time in such a way, as opposed to the days elapsed  
208 between germination and flowering, incorporates variability in time to germination and is more  
209 directly relevant to phenological timing as measured in wild populations; both traits showed a  
210 similar pattern across years (Table S1). Total number of flowers produced was measured when  
211 all flowers had opened on a plant. Shoot biomass was collected at the end of the experiment and

212 plants were dried before weighing. Two pairs of traits were strongly correlated [number of  
213 flowers produced and shoot biomass ( $r = 0.72$ ); SLA and leaf succulence ( $r = 0.81$ ); Fig. S2]. We  
214 report on number of flowers produced and specific leaf area below, as flowers produced is a  
215 more direct proxy for plant fitness than shoot biomass, and SLA is a more commonly-reported  
216 trait than leaf succulence. We include descriptive statistics for shoot biomass and leaf succulence  
217 in Table S1.

## 218 Statistical analyses

219 All statistical analyses were conducted in R version 4.1.2 [44]. Data were organized and  
220 summarized using the `tidyr` [45] and `dplyr` [46] packages and plotted using `ggplot2` [47]. All data  
221 and code necessary to reproduce these analyses are uploaded with the submission and will be  
222 archived at FigShare upon acceptance.

## 223 Phenotypic evolution

224 We used linear mixed models [package `lme4` [48]] to test for differences among year  
225 cohorts in the measured phenotypic traits (days to germination, growth rate, flowering date,  
226 SLA, and flower number). We analyzed populations separately because our main interest was in  
227 differences among year cohorts, not populations, and we had limited power to detect interactions  
228 between population and year. All models took the general form of  $response \sim year + transplant$   
229  $age + (1/sire/dam)$ . Transplant age (days elapsed between germination and transplanting from  
230 germination tray to full pot) was included as a covariate to account for differing seedling ages  
231 when transplanted to pots. Sire, and dam nested within sire, were included as random effects to  
232 account for non-independence amongst related individuals. For days to germination, dam

233 average seed weight was included as a covariate and transplant age was not. Only seeds that  
234 germinated were included in days to germination analyses (germination rates for cohorts ranged  
235 from 0.61 to 0.75). Days to germination and SLA were log transformed prior to analysis to better  
236 meet assumptions of homoscedasticity and normality of model residuals. We tested whether  
237 inclusion of terms improved model fit with Wald  $\lambda^2$  tests using Type II SS [Anova.mermod()  
238 function in the car package [49]]. If year was a significant predictor at  $\alpha = 0.05$ , we followed up  
239 with pairwise Tukey contrasts between year cohorts using the emmeans package [50].

240

## 241 Genetic variance components

242 We estimated quantitative genetic variance components for all traits in both populations  
243 using an animal model implemented in the MCMCglmm package [51]. In short, the animal  
244 model approach comprises a linear mixed effects model with an individual's breeding (i.e.,  
245 additive genetic) value modeled as a random effect [52,53]. A pedigree of the population  
246 provides an expectation of how breeding values should covary between individuals, and thus  
247 allows for an estimate of a trait's additive genetic variance in that population. MCMCglmm uses  
248 a Markov Chain Monte Carlo approach in a Bayesian framework to approximate the posterior  
249 distribution of quantitative genetic variance components.

250 Days to germination and SLA were log transformed prior to analysis. Each model  
251 included year and transplant age as fixed effects (except for the model of days to germination,  
252 where we used dam seed weight instead of transplant age) and animal as a random effect (in  
253 MCMCglmm, individuals are "animals" and this model form is used to estimate additive genetic  
254 variance). We used weakly informative priors for each model: an inverse-Gamma prior for  
255 residual variance ( $V=1$ ,  $\nu=1$ ) and a parameter-expanded prior for the random effect ( $V=1$ ,  $\nu=1$ ,

256 alpha.mu=0, alpha.V=1000). We ran each model for 800,000 iterations with a burn-in of 15,000  
257 and thinning of 250. The effective sampling sizes for random effects ranged from 2,038-3,442.  
258 To test for maternal environmental effects, we also built models with *dam* as a random effect in  
259 addition to *animal* and compared these models to the model without *dam* using deviance  
260 information criterion (DIC). If including the *dam* term improved model fit (i.e., smaller DIC  
261 value), we used this model including maternal environmental effects to estimate variance  
262 components [53]. We used parameter-expanded priors because these often result in better mixing  
263 of the MCMC chains and allow more flexibility in the shape of the prior [54]. Using a weakly  
264 informative prior without parameter expansion ( $V=1$ ,  $\nu = 0.002$  for both residual variance and  
265 random effects) resulted in qualitatively similar patterns in  $h^2$  overall, though estimates of  $h^2$  for  
266 days to germination and growth rate for the S22 population, and growth rate and SLA for the  
267 KYE population, were higher compared to results using parameter expanded priors (Fig. S3).

268       Following de Villemereuil [54] we obtained estimates of additive genetic variance ( $V_A$ ),  
269 residual variance ( $V_R$ ), and the variance explained by fixed effects ( $V_F$ ) from the model, and  
270 calculated  $h^2 = V_A / (V_A + V_R + V_F)$ ; we report the mean of the posterior distribution of  $h^2$  as our  
271 estimate. We considered a trait to exhibit significant heritability if its 95% credible interval for  $h^2$   
272 did not touch zero (in MCMCglmm, variance estimates cannot go below zero). MCMCglmm  
273 diagnostic plots and posterior distribution of model parameters are included in SI: MCMCglmm.  
274

275

## Results

### 276 Climate and demography

277 Both sites experienced a period of substantially reduced precipitation in years 2012-2015  
278 (Fig 1). For KYE, growing season precipitation was reduced by 45% compared to 2006-2011;  
279 for S22, precipitation was reduced 57%. Precipitation increased in 2016 and 2017 at both sites,  
280 with particularly high precipitation in 2017.

281 Overall, population densities were higher at KYE, the site nearer the range center,  
282 relative to S22, which is located near the range edge. Reduced precipitation during the 2012-  
283 2015 drought period had strong effects on population abundance at both sites (Fig. 1). At KYE,  
284 fruiting plant estimates during this drought period were 94% lower than pre-drought estimates  
285 (0.5 and 7.7 fruiting plants per m<sup>2</sup>, respectively), though the pre-drought average was largely  
286 influenced by high abundances in 2010 and 2011 (Fig. 1). At S22, plant densities during the  
287 drought period were 83% lower than pre-drought estimates (0.4 and 2.3 fruiting plants per m<sup>2</sup>,  
288 respectively). In the two years post-drought, fruiting plants remained few at KYE. At S22, the  
289 number of fruiting plants somewhat rebounded in 2017.

290 Seed input prior to the drought was roughly twice as high at KYE relative to S22 (yearly  
291 mean of 1198 and 646 seeds per m<sup>2</sup>, respectively). Seed input was especially high at KYE in the  
292 two years preceding the drought, 2010-2011. Seed input was similar at KYE and S22 during the  
293 2012-2015 drought period (92 and 76 seeds per m<sup>2</sup>, respectively; Fig. 1). In the two years post-  
294 drought, patterns of seed input mirrored patterns of plant density, with input remaining low at  
295 KYE but trending upward at S22 in 2017.

296

297

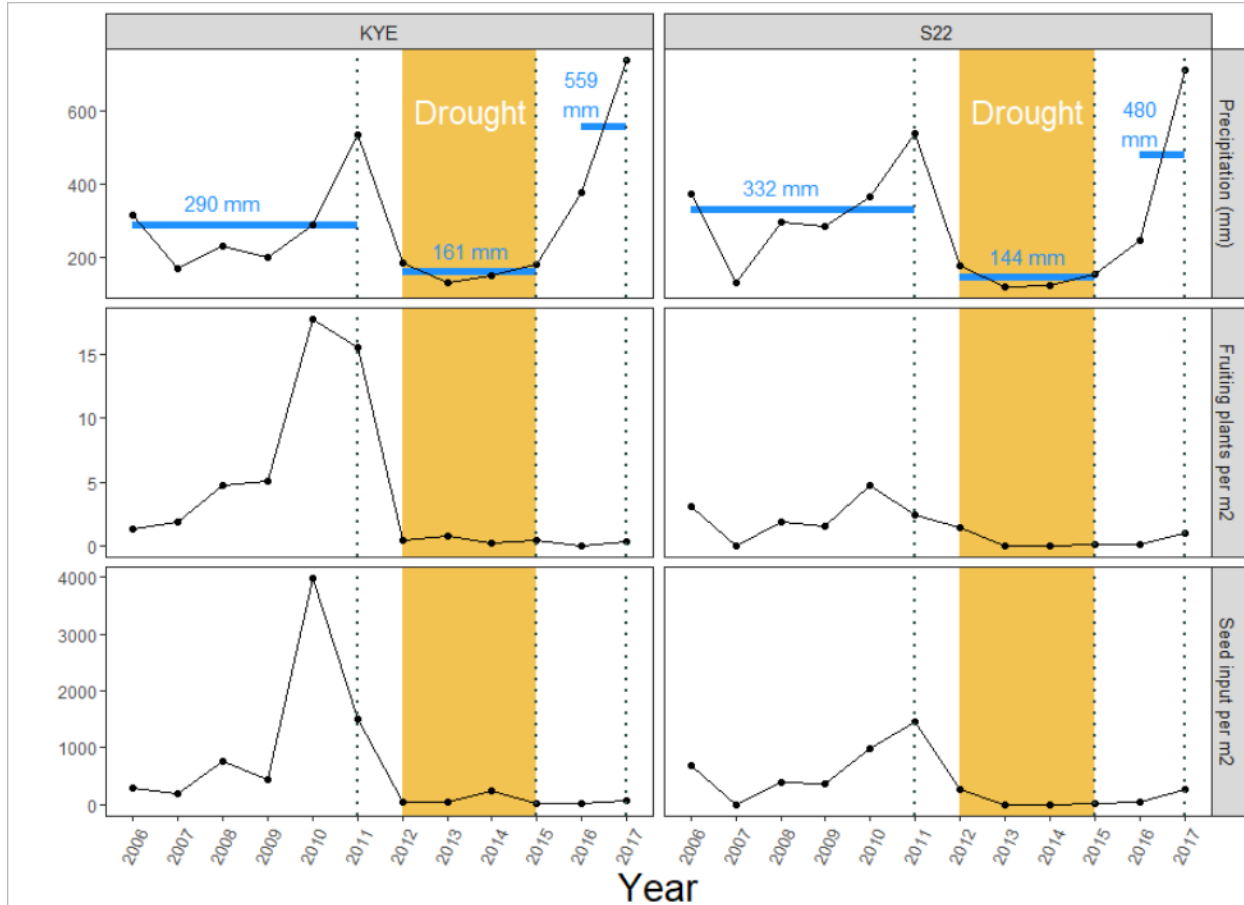

298

299

300 **Figure 1.** Environmental and demographic trends in two populations (KYE, S22) of the  
301 California annual plant *Clarkia xantiana ssp. xantiana* from 2006-2017. Precipitation represents  
302 the cumulative growing season precipitation for a given year (i.e., precipitation for year 2011  
303 was the cumulative precipitation from November 2010 – June 2011). Blue horizontal bars in top  
304 panels mark the mean precipitation across three periods – pre-drought, during drought, and post-  
305 drought, with the drought period (2012-2015) highlighted in gold. Seeds were collected in July  
306 of each year, at the end of the growing season.

307

## 308 Phenotypic evolution

309 For S22, days to flowering differed among year cohorts ( $P = 0.004$ ; Fig. 2; Table S2).  
310 Days to flowering decreased 1.6 days from 2011 to 2015, and another 1.2 days from 2015 to  
311 2017. Pairwise Tukey tests identified the 2011 / 2017 contrast in days to flowering as significant  
312 (69.4 vs. 66.4 days, respectively;  $P = 0.006$ ). Phenotypic variance in days to flowering also  
313 decreased across year cohorts, from 28.6 in 2011, to 21.3 in 2015, to 14.3 in 2017 (Table S1).  
314 There was also a trend in S22, albeit not significant, for growth rate to increase over this  
315 timeline, which may have contributed to earlier flowering time. There was no discernible  
316 evidence of phenotypic evolution of other traits for S22, nor any traits in the KYE population.

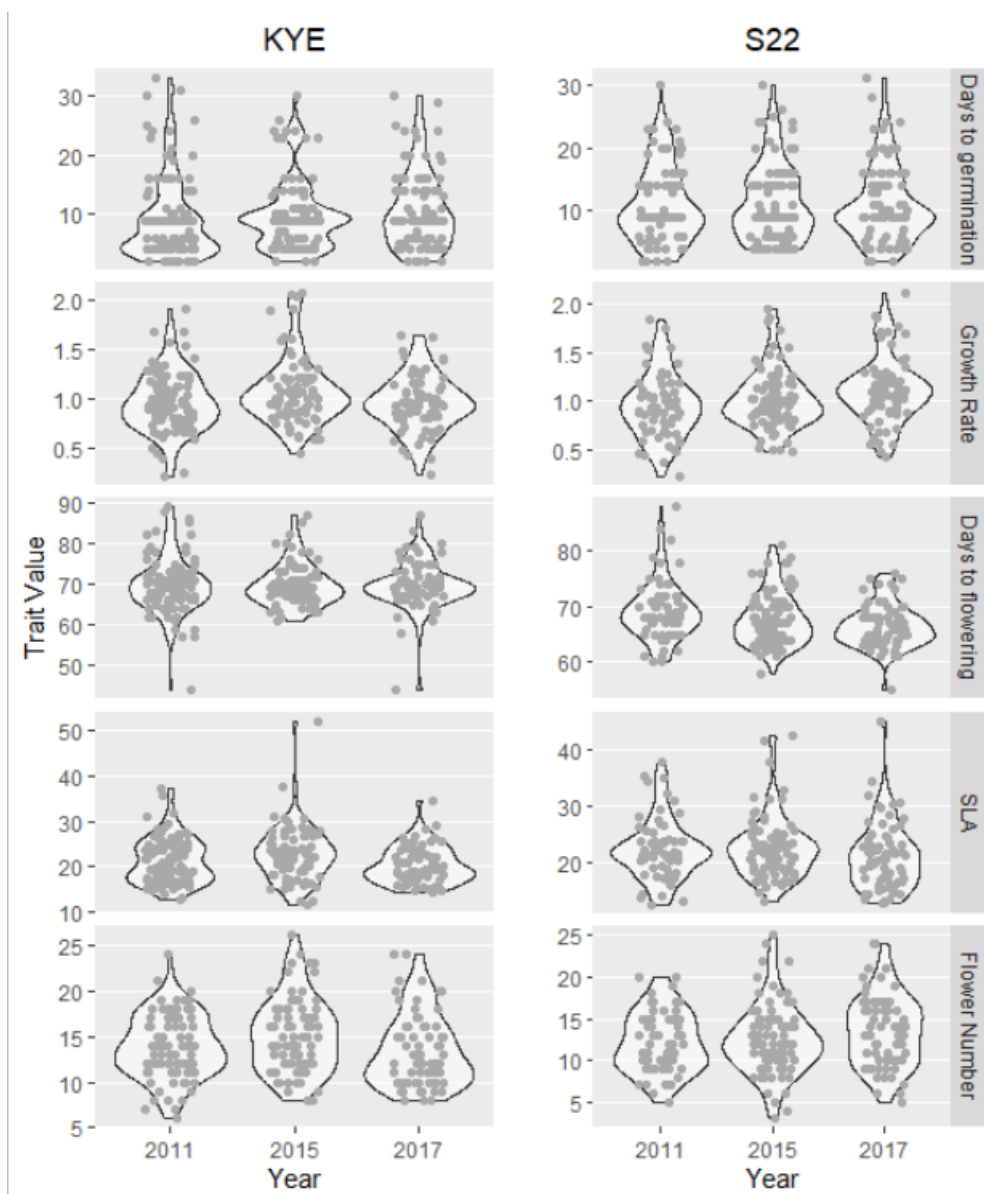

317

318 **Figure 2.** Measured phenotypes across the three sampling years for populations KYE and S22.  
319 Each panel shows raw data (jittered horizontally) and violin (kernel density) plots. Days to  
320 germination was measured as days elapsed between sowing and emergence; growth rate was  
321 measured as leaves produced per day; days to flowering was measured as days elapsed between  
322 sowing and opening of the first flower; SLA was calculated as  $\text{mm}^2 \text{mg}^{-1}$ ; flower number was  
323 measured as the total number of flowers an individual produced in its lifetime.

324

325



## 326 Additive genetic variance

327 There was evidence of significant additive genetic variance ( $V_A$ ) for days to germination,  
328 flowering date, and flower number in both populations (Fig. 3; Table S3) The  $h^2$  estimates for  
329 these traits ranged from 0.32 – 0.59. There was also evidence of significant  $V_A$  for growth rate in  
330 the S22 population, but not in the KYE population. We did not find evidence that  $V_A$  for SLA  
331 was significantly different from zero in either population. For KYE, growth rate and SLA models  
332 included a *dam* term (representing a maternal environmental effect; see Materials and Methods).  
333

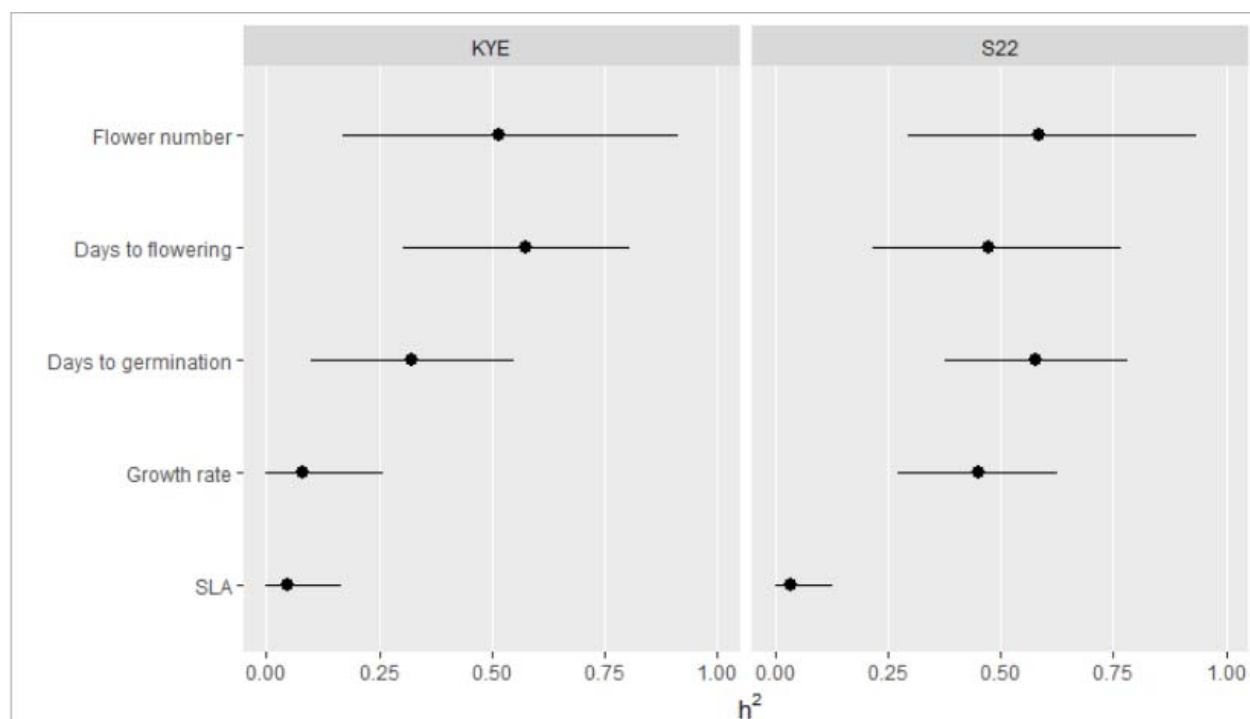

334  
335 **Figure 3.** Estimates of narrow-sense heritability ( $h^2$ ) for traits, with 95% credible intervals.  
336 Estimates of additive genetic variance for each trait are in Table S3.

337  
338  
339  
340  
341

342

## Discussion

343           Extreme environmental perturbations offer an important opportunity to examine rapid  
344 evolution in natural populations. We leveraged a resurrection approach to test for rapid evolution  
345 in two populations of a California annual plant in response to a multi-year drought where  
346 growing season precipitation decreased by ca. 50% compared to the previous six-year period.  
347 We found evidence of evolution in flowering phenology in one of the populations (S22), such  
348 that earlier flowering had evolved by the end of the drought and continued to evolve after the  
349 drought ended. We did not find evidence of phenotypic evolution in any other measured trait at  
350 S22, and in no traits in the other population, KYE. We detected substantial additive genetic  
351 variance in three traits in both populations, including flowering phenology, suggesting that  
352 responses to selection for those traits were not constrained by limited genetic variation. Our  
353 long-term demographic observations showed that inputs to the seed bank in the two years prior  
354 to the drought were 125% higher in KYE than S22, suggesting that the probability of rapid  
355 evolutionary responses to drought may have been influenced by the magnitude of gene flow  
356 through time.

357           Why does rapid evolution occur in some populations but not others? One hypothesis is  
358 that a lack of quantitative genetic variation in a trait will limit its response to even intense  
359 episodes of selection. Given that there was no observable phenotypic evolution of phenology (or  
360 any other trait) in KYE, this hypothesis would predict low amounts of  $V_A$  for phenology in this  
361 population. However, we found substantial  $V_A$  and high heritability for flowering phenology in  
362 both populations. Thus, these results do not support genetic variation limiting phenological  
363 evolution in KYE (with the caveat that estimates of  $h^2$  are environment-dependent and could  
364 differ between the greenhouse and field). Other studies have similarly found that rapid evolution

365 occurred in some but not all studied populations [12,13]. However, in most studies, estimates of  
366  $V_A$  are not available to evaluate whether genetic constraints might be important (but see Franks et  
367 al. 2007). It is also worth noting that phenotypic variance in flowering phenology in S22  
368 decreased 50% over the timespan of our study, consistent with a strong episode of selection.  
369 Though we did not have the statistical power to precisely estimate  $V_A$  for individual year cohorts,  
370 this decrease in  $V_p$  should largely reflect a decrease in  $V_A$ , because environmental variation  
371 should have been relatively constant across cohorts grown contemporaneously in the greenhouse.  
372 Thus, the erosion of genetic variation due to this drought could constrain future responses to  
373 other episodes of selection on phenology.

374 A more likely explanation for the lack of phenological evolution in KYE is that gene  
375 flow in space or time might reintroduce alleles that are maladapted to conditions during an  
376 extreme event. Spatial gene flow among populations could potentially oppose allele frequency  
377 changes favored by selection. However, over the course of this four-year drought, gene flow  
378 among populations is unlikely to be strong enough to influence evolutionary change, given that  
379 our focal populations are isolated from other populations by at least one kilometer and this  
380 species lacks adaptations for long-distance dispersal. For many plant species, however, gene  
381 flow also occurs through time as individuals emerge from a seed bank and mate [25,26]. For  
382 annual plants, seed banks thus result in overlapping, instead of discrete generations. If older  
383 generations were input to the seed bank during a period when the nature of selection differed,  
384 these “stored genotypes” could prevent or slow adaptation to the contemporary environment  
385 [27].

386 Though it was long assumed that *Clarkia* species had little if any seed storage [e.g., 55],  
387 recent work has challenged this assumption for *C. x. xantiana* [e.g., 56]. Though the seed bank is

388 relatively short-lived when seeds are exposed near the soil surface, with ~ 90% of seeds  
389 germinating or dying within three years (M. Geber et al., unpubl. data), seeds may remain viable  
390 for at least 11 years when buried deeper (Moeller, unpubl. data). Thus a population's seed  
391 production in the years prior to the drought likely affected its genotypic composition in later  
392 years, with the magnitude of that effect presumably proportional to seed input. There were  
393 substantial differences in pre-drought seed input between our two studied populations. Seed  
394 input at KYE in the two years pre-drought (2010-2011) was more than twice that at S22 (two  
395 year total of 5,479 vs. 2,429 seeds per m<sup>2</sup>, respectively). Furthermore, field experiments showed  
396 that KYE seeds were twice as likely as S22 seeds to remain viable but ungerminated after three  
397 years on the soil surface (ca. 10% vs. 5%, respectively; M. Geber et al., unpubl. data). High rates  
398 of gene flow from pre-drought generations at KYE thus may have constrained rapid evolution of  
399 phenology during the drought in this population. This hypothesis is further supported by the  
400 observation that at Mill Creek (MC), the third population grown during the refresher generation,  
401 pre-drought seed input was even higher than at KYE (2010-2011 total of 8,101 seeds per m<sup>2</sup>) and  
402 no traits exhibited signs of phenotypic evolution (Fig. S1). The seed bank could also help explain  
403 our observation that S22 continued to evolve more accelerated flowering phenology after the  
404 drought ended and selection was presumably relaxed. This may simply reflect the gradual  
405 turnover of the seed bank – i.e., the influence of pre-drought generations on the genotypic  
406 composition of the sampled population will decrease with time.

407         The hypotheses above are not exhaustive, and it is worth exploring alternative  
408 explanations for the lack of evolutionary change in phenology at KYE. The demographic cost of  
409 a selective episode could lead to reduced efficacy of selection and increased influence of  
410 stochastic processes. We observed large demographic declines in both populations due to the

411 drought, which likely increased the influence of genetic drift. However, the fact that both  
412 precipitation and population density during the drought are similar for these two populations  
413 leaves us still with the conundrum of why phenology evolved in S22 but not KYE. It is possible  
414 that there was simply no or weak selection on phenology in KYE. This could be because the  
415 drought was less severe at that site or because KYE was already adapted due to historical  
416 selection on phenology. Though these scenarios are possible, the population's large demographic  
417 decline during the drought suggests a severe environmental perturbation similar to that at S22,  
418 and any "pre" adaptation, if present, was not sufficient to avoid large demographic  
419 consequences. It is also possible that advanced phenology simply did not confer fitness benefits  
420 during drought at KYE, though this would be contrary to both general trends in plants [40] and  
421 the well documented relationship between early flowering time and adaptation to aridity in *C. x.*  
422 *xantiana* and close relatives [37,41,57–60].

423         The evolution of earlier flowering observed at S22 is consistent with post-drought  
424 resurrection studies in *Brassica rapa* [5,33], and likely reflects a strategy of drought escape as  
425 documented in many other plant species [reviewed in 40,61,62]. Though the evolution of more  
426 rapid phenology during drier periods is not ubiquitous [see 12,14], there are several reasonable  
427 hypotheses for why flowering phenology is more likely to rapidly evolve relative to other traits.  
428 Phenology is often influenced by alleles of major effect [e.g., 61], which may enable it to  
429 respond quickly to abrupt environmental changes relative to more highly polygenic traits.  
430 Experimental evolution studies have shown that adaptation to abrupt environmental change often  
431 involves few mutations of large effect [61,63,64], whereas adaptation to gradual change may  
432 involve more loci of smaller effect [64]. Furthermore, past work on *C. x. xantiana* has shown that  
433 flowering phenology has the highest  $Q_{ST}$  of six ecologically-important traits examined across its

434 range [57]. This result suggests that flowering phenology is often the target of spatially-variable  
435 selection in this system and readily evolves. The evolutionary lability of flowering phenology  
436 could also be due to its direct tie to assortative mating [65] — early flowering individuals tend to  
437 mate with other early flowering individuals. Theoretical work has shown that when there is  
438 directional selection on flowering phenology, positive assortative mating via flowering time can  
439 increase genetic variation, and consequently the rate of phenotypic evolution of phenology  
440 compared to scenarios with random mating [66,67].

441         A population's response to environmental change will be determined by the interplay of  
442 demography, genetics, selection, and stochastic processes. Here, we have shown that flowering  
443 phenology rapidly evolved during and after a climate change-induced drought in one population.  
444 Whereas, in a second population we observed no sign of rapid evolution despite similar  
445 environmental stress, demographic decline, and the presence of substantial additive genetic  
446 variance in measured traits. In both populations, our results are consistent with the hypothesis  
447 that gene flow through time (via seed banks) either slowed or prevented rapid evolution. While  
448 the potential for seed banks to influence evolutionary processes is well known, there is little  
449 consideration of this phenomenon as it relates to adaptation in response to extreme  
450 environmental events, which are increasing in frequency with climate change. Our results  
451 suggest the somewhat unintuitive notion that, given the existence of a seed bank, higher  
452 fecundity of populations prior to an extreme event could actually serve to retard responses to  
453 selection during the event. As we seek to build more predictive models of rapid evolution in  
454 natural populations, the synthesis of demographic, life history, and quantitative genetic data will  
455 be invaluable for understanding where and when rapid evolution occurs.

456  
457  
458  
459  
460  
461  
462  
463  
464  
465  
466  
467  
468  
469  
470  
471  
472  
473  
474  
475  
476  
477  
478  
479  
480  
481  
482  
483  
484  
485  
486  
487  
488  
489  
490  
491  
492

## Acknowledgments

We are deeply indebted to Monica Geber and Vince Eckhart for their assistance with collection of the seed used in this experiment, their tireless work in collecting *C. x. xantiana* long-term demographic and environmental data, and for their comments on a previous version of this manuscript. We thank Eric Bakken, Ryan Allen, Hannah Littel, Samantha Sorg, and Adam Kostanecki for their assistance with the resurrection experiment. Conversations with Ruth Shaw and Seema Sheth were invaluable in the original formulation and design of the resurrection experiment.

493

## References

- 494 1. Grant PR, Grant BR, Huey RB, Johnson MTJ, Knoll AH, Schmitt J. 2017 Evolution caused  
495 by extreme events. *Philos. Trans. R. Soc. Lond. B Biol. Sci.* **372**.  
496 (doi:10.1098/rstb.2016.0146)
- 497 2. Donihue CM, Herrel A, Fabre A-C, Kamath A, Geneva AJ, Schoener TW, Kolbe JJ, Losos  
498 JB. 2018 Hurricane-induced selection on the morphology of an island lizard. *Nature* **560**,  
499 88–91.
- 500 3. Campbell-Staton SC, Cheviron ZA, Rochette N, Catchen J, Losos JB, Edwards SV. 2017  
501 Winter storms drive rapid phenotypic, regulatory, and genomic shifts in the green anole  
502 lizard. *Science* **357**, 495–498.
- 503 4. Grant PR, Grant BR. 2002 Unpredictable evolution in a 30-year study of Darwin’s finches.  
504 *Science* **296**, 707–711.
- 505 5. Franks SJ, Sim S, Weis AE. 2007 Rapid evolution of flowering time by an annual plant in  
506 response to a climate fluctuation. *Proc. Natl. Acad. Sci. U. S. A.* **104**, 1278–1282.
- 507 6. Shaw RG, Etterson JR. 2012 Rapid climate change and the rate of adaptation: insight from  
508 experimental quantitative genetics. *New Phytol.* **195**, 752–765.
- 509 7. Peschel AR, Boehm EL, Shaw RG. 2021 Estimating the capacity of *Chamaecrista*  
510 *fasciculata* for adaptation to change in precipitation. *Evolution* **75**, 73–85.
- 511 8. Geber MA, Dawson TE. 1993 Evolutionary responses of plants to global change. In *Biotic*  
512 *interactions and global change* (ed Kareiva, PM and Kingsolver, JG and Huey, RB), pp.  
513 179–197. Sunderland, Mass.: Sinauer.
- 514 9. Etterson JR, Franks SJ, Mazer SJ, Shaw RG, Gorden NLS, Schneider HE, Weber JJ,  
515 Winkler KJ, Weis AE. 2016 Project Baseline: An unprecedented resource to study plant  
516 evolution across space and time. *Am. J. Bot.* **103**, 164–173.
- 517 10. Franks SJ, Hamann E, Weis AE. 2018 Using the resurrection approach to understand  
518 contemporary evolution in changing environments. *Evol. Appl.* **11**, 17–28.
- 519 11. Dickman EE, Pennington LK, Franks SJ, Sexton JP. 2019 Evidence for adaptive responses  
520 to historic drought across a native plant species range. *Evol. Appl.* (doi:10.1111/eva.12803)
- 521 12. Anstett DN, Branch HA, Angert AL. 2021 Regional differences in rapid evolution during  
522 severe drought. *Evol. Lett.* (doi:10.1002/evl3.218)
- 523 13. Wooliver R, Tittes SB, Sheth SN. 2020 A resurrection study reveals limited evolution of  
524 thermal performance in response to recent climate change across the geographic range of  
525 the scarlet monkeyflower. *Evolution* (doi:10.1111/evo.14041)
- 526 14. Vtipil EE, Sheth SN. 2020 A resurrection study reveals limited evolution of phenology in



- 527 response to recent climate change across the geographic range of the scarlet monkeyflower.  
528 *Ecol. Evol.* **10**, 14165–14177.
- 529 15. Haldane JBS. 1957 The cost of natural selection. *J. Genet.* **55**, 511.
- 530 16. Gomulkiewicz R, Houle D. 2009 Demographic and genetic constraints on evolution. *Am.*  
531 *Nat.* **174**, E218-29.
- 532 17. Bell G. 2017 Evolutionary Rescue. *Annu. Rev. Ecol. Evol. Syst.* **48**, 605–627.
- 533 18. Lynch M, Lande R. 1993 Evolution and extinction in response to environmental change. In  
534 *Biotic interactions and global change* (ed Kareiva, PM and Kingsolver, JG and Huey, RB),  
535 pp. 234–250. Sunderland, Mass.: Sinauer.
- 536 19. Hufbauer RA, Szűcs M, Kasyon E, Youngberg C, Koontz MJ, Richards C, Tuff T,  
537 Melbourne BA. 2015 Three types of rescue can avert extinction in a changing environment.  
538 *Proc. Natl. Acad. Sci. U. S. A.* **112**, 10557–10562.
- 539 20. Lindsey HA, Gallie J, Taylor S, Kerr B. 2013 Evolutionary rescue from extinction is  
540 contingent on a lower rate of environmental change. *Nature* **494**, 463–467.
- 541 21. Holt RD. 2004 Temporal variation can facilitate niche evolution in harsh sink environments.  
542 *Am. Nat.* **164**, 187–200.
- 543 22. Evans MEK, Dennehy JJ. 2005 Germ banking: bet-hedging and variable release from egg  
544 and seed dormancy. *Q. Rev. Biol.* **80**, 431–451.
- 545 23. Kalisz S, McPeck MA. 1992 Demography of an age-structured annual: Resampled  
546 projection matrices, elasticity analyses, and seed bank effects. *Ecology* **73**, 1082–1093.
- 547 24. Evans MEK, Ferrière R, Kane MJ, Venable DL. 2007 Bet hedging via seed banking in  
548 desert evening primroses (*Oenothera*, Onagraceae): demographic evidence from natural  
549 populations. *Am. Nat.* **169**, 184–194.
- 550 25. Gottlieb LD. 1974 Genetic Stability in a Peripheral Isolate of *Stephanomeria exigua* ssp.  
551 *coronaria* That Fluctuates in Population Size. *Genetics* **76**, 551–556.
- 552 26. Epling C, Lewis H, Ball FM. 1960 The Breeding Group and Seed Storage: A Study in  
553 Population Dynamics. *Evolution* **14**, 238–255.
- 554 27. Templeton AR, Levin DA. 1979 Evolutionary Consequences of Seed Pools. *Am. Nat.* **114**,  
555 232–249.
- 556 28. Hairston NG Jr, De Stasio BT Jr. 1988 Rate of evolution slowed by a dormant propagule  
557 pool. *Nature* **336**, 239–242.
- 558 29. Levin DA. 1990 The Seed Bank as a Source of Genetic Novelty in Plants. *Am. Nat.* **135**,  
559 563–572.

- 560 30. Blows MW, Hoffmann AA. 2005 A reassessment of genetic limits to evolutionary change.  
561 *Ecology* **86**, 1371–1384.
- 562 31. Barton N, Partridge L. 2000 Limits to natural selection. *Bioessays* **22**, 1075–1084.
- 563 32. Falconer DS. 1996 *Introduction to quantitative genetics*. 4th edn. Essex, England: Pearson  
564 Education.
- 565 33. Hamann E, Weis AE, Franks SJ. 2018 Two decades of evolutionary changes in *Brassica*  
566 *rapa* in response to fluctuations in precipitation and severe drought. *Evolution*  
567 (doi:10.1111/evo.13631)
- 568 34. Cook BI, Ault TR, Smerdon JE. 2015 Unprecedented 21st century drought risk in the  
569 American Southwest and Central Plains. *Sci Adv* **1**, e1400082.
- 570 35. Williams AP, Cook BI, Smerdon JE. 2022 Rapid intensification of the emerging  
571 southwestern North American megadrought in 2020–2021. *Nat. Clim. Chang.* **12**, 232–234.
- 572 36. Williams AP, Cook ER, Smerdon JE, Cook BI, Abatzoglou JT, Bolles K, Baek SH, Badger  
573 AM, Livneh B. 2020 Large contribution from anthropogenic warming to an emerging North  
574 American megadrought. *Science* **368**, 314–318.
- 575 37. Eckhart VM, Geber MA. 1999 Character variation and geographic range in *Clarkia xantiana*  
576 (Onagraceae): breeding system and phenology distinguish two common subspecies.  
577 *Madrono*
- 578 38. Webb RW. 1936 Kern Canyon Fault, Southern Sierra Nevada. *J. Geol.* **44**, 631–638.
- 579 39. Brossy CC *et al.* 2012 Map of the late Quaternary active Kern Canyon and Breckenridge  
580 faults, southern Sierra Nevada, California. *Geosphere* **8**, 581–591.
- 581 40. Kooyers NJ. 2015 The evolution of drought escape and avoidance in natural herbaceous  
582 populations. *Plant Sci.* **234**, 155–162.
- 583 41. Burnette TE, Eckhart VM. 2021 Evolutionary divergence of potential drought adaptations  
584 between two subspecies of an annual plant: Are trait combinations facilitated, independent,  
585 or constrained? *Am. J. Bot.* (doi:10.1002/ajb2.1607)
- 586 42. Ogburn RM, Edwards EJ. 2012 Quantifying succulence: a rapid, physiologically  
587 meaningful metric of plant water storage. *Plant Cell Environ.* **35**, 1533–1542.
- 588 43. Schneider CA, Rasband WS, Eliceiri KW. 2012 NIH Image to ImageJ: 25 years of image  
589 analysis. *Nat. Methods* **9**, 671–675.
- 590 44. R Foundation For Statistical Computing. 2021 *R: A language and environmnet for*  
591 *statistical computing*.
- 592 45. Wickham H, Girlich M. 2022 tidy: Tidy Messy Data. See <https://tidyr.tidyverse.org>,

- 593 <https://github.com/tidyverse/tidyr>.
- 594 46. Wickham H, François R, Henry L, Müller K. 2022 dplyr: A Grammar of Data  
595 Manipulation. See <https://dplyr.tidyverse.org>, <https://github.com/tidyverse/dplyr>.
- 596 47. Wickham H. 2009 *ggplot2: Elegant Graphics for Data Analysis*. New York: Springer-  
597 Verlag.
- 598 48. Bates D, Mächler M, Bolker B, Walker S. 2015 Fitting Linear Mixed-Effects Models Using  
599 lme4. *Journal of Statistical Software*. **67**, 1–48. (doi:10.18637/jss.v067.i01)
- 600 49. Fox J, Weisberg S. 2011 *An R Companion to Applied Regression*. Thousand Oaks, CA:  
601 Sage.
- 602 50. Lenth R. 2018 Emmeans: Estimated marginal means, aka least-squares means. *R Package*  
603 *Version 1*.
- 604 51. Hadfield JD. 2010 MCMC Methods for Multi-Response Generalized Linear Mixed Models:  
605 The MCMCglmm R Package. *J. Stat. Softw.* **33**, 1–22.
- 606 52. Kruuk LEB. 2004 Estimating genetic parameters in natural populations using the ‘animal  
607 model.’ *Philos. Trans. R. Soc. Lond. B Biol. Sci.* **359**, 873–890.
- 608 53. Wilson AJ, Réale D, Clements MN, Morrissey MM, Postma E, Walling CA, Kruuk LEB,  
609 Nussey DH. 2010 An ecologist’s guide to the animal model. *J. Anim. Ecol.* **79**, 13–26.
- 610 54. de Villemereuil P. 2018 Quantitative genetic methods depending on the nature of the  
611 phenotypic trait. *Ann. N. Y. Acad. Sci.* **1422**, 29–47.
- 612 55. Lewis H. 1962 Catastrophic Selection as a Factor in Speciation. *Evolution* **16**, 257–271.
- 613 56. Eckhart VM, Geber MA, Morris WF, Fabio ES, Tiffin P, Moeller DA. 2011 The geography  
614 of demography: long-term demographic studies and species distribution models reveal a  
615 species border limited by adaptation. *Am. Nat.* **178**, S26-43.
- 616 57. Gould B, Moeller DA, Eckhart VM, Tiffin P, Fabio E, Geber MA. 2014 Local adaptation  
617 and range boundary formation in response to complex environmental gradients across the  
618 geographical range of *Clarkia xantiana* ssp. *xantiana*. *J. Ecol.* **102**, 95–107.
- 619 58. Eckhart VM, Geber MA, McGuire CM. 2004 Experimental studies of adaptation in *Clarkia*  
620 *xantiana*. I. Sources of trait variation across a subspecies border. *Evolution* **58**, 59–70.
- 621 59. Anderson JT, Eckhart VM, Geber MA. 2015 Experimental studies of adaptation in *Clarkia*  
622 *xantiana*. III. Phenotypic selection across a subspecies border. *Evolution* **69**, 2249–2261.
- 623 60. Mazer SJ, Dudley LS, Hove AA, Emms SK, Verhoeven AS. 2010 Physiological  
624 Performance in *Clarkia* Sister Taxa with Contrasting Mating Systems: Do Early-Flowering  
625 Autogamous Taxa Avoid Water Stress Relative to Their Pollinator-Dependent

- 626 Counterparts? *Int. J. Plant Sci.* **171**, 1029–1047.
- 627 61. Fulgione A *et al.* 2022 Parallel reduction in flowering time from de novo mutations enable  
628 evolutionary rescue in colonizing lineages. *Nat. Commun.* **13**, 1461.
- 629 62. Metz J, Lampei C, Bäumlner L, Bocherens H, Dittberner H, Henneberg L, de Meaux J,  
630 Tielbörger K. 2020 Rapid adaptive evolution to drought in a subset of plant traits in a large-  
631 scale climate change experiment. *Ecol. Lett.* (doi:10.1111/ele.13596)
- 632 63. Lenski RE, Travisano M. 1994 Dynamics of adaptation and diversification: a 10,000-  
633 generation experiment with bacterial populations. *Proc. Natl. Acad. Sci. U. S. A.* **91**, 6808–  
634 6814.
- 635 64. Collins S, de Meaux J. 2009 Adaptation to different rates of environmental change in  
636 *Chlamydomonas*. *Evolution* **63**, 2952–2965.
- 637 65. Franks SJ, Weis AE. 2009 Climate change alters reproductive isolation and potential gene  
638 flow in an annual plant. *Evol. Appl.* **2**, 481–488.
- 639 66. Fox GA. 2003 Assortative mating and plant phenology: evolutionary and practical  
640 consequences. *Evol. Ecol. Res.* **5**, 1–18.
- 641 67. Godineau C, Ronce O, Devaux C. 2021 Assortative mating can help adaptation of flowering  
642 time to a changing climate: Insights from a polygenic model. *J. Evol. Biol.*  
643 (doi:10.1111/jeb.13786)
